# Supplementary material for: Evidence for widespread dysregulation of circadian clock progression in human cancer
Source: PeerJ. 2018 Jan 31;6:e4327. doi: 10.7717/peerj.4327 (PMC5797448; doi:10.7717/peerj.4327)
Supplement: Table S2 [file peerj-06-4327-s003.csv]

symbol1	symbol2	rhoMeta
Arntl	Clock	0.7249285525930265
Arntl	Cry1	0.27817941734825
Arntl	Cry2	-0.6363768091152799
Arntl	Dbp	-0.9146446580320629
Arntl	Npas2	0.7754709004193397
Arntl	Nr1d1	-0.6037514051847261
Arntl	Nr1d2	-0.8614805872675428
Arntl	Per1	-0.7471112270277356
Arntl	Per2	-0.5945528630679193
Arntl	Per3	-0.823418212544465
Arntl	Tef	-0.8473980357473699
Clock	Arntl	0.7249285525930265
Clock	Cry1	0.06541973887685623
Clock	Cry2	-0.5972756017941481
Clock	Dbp	-0.645511131925004
Clock	Npas2	0.6343961275585874
Clock	Nr1d1	-0.3002463589006351
Clock	Nr1d2	-0.6031794883488697
Clock	Per1	-0.6364952995268504
Clock	Per2	-0.5695840536120815
Clock	Per3	-0.7144611850829129
Clock	Tef	-0.7595101095772043
Cry1	Arntl	0.27817941734825
Cry1	Clock	0.06541973887685623
Cry1	Cry2	-0.012457650804017978
Cry1	Dbp	-0.3401804672897463
Cry1	Npas2	0.07402796765934631
Cry1	Nr1d1	-0.7225359580320011
Cry1	Nr1d2	-0.40990436181618845
Cry1	Per1	-0.1411755648029434
Cry1	Per2	0.25538495810553313
Cry1	Per3	-0.02528160413657544
Cry1	Tef	-0.07811010288865948
Cry2	Arntl	-0.6363768091152799
Cry2	Clock	-0.5972756017941481
Cry2	Cry1	-0.012457650804017978
Cry2	Dbp	0.6618797053386846
Cry2	Npas2	-0.6263229987696222
Cry2	Nr1d1	0.28367323665722516
Cry2	Nr1d2	0.6234166103745656
Cry2	Per1	0.6454257049601584
Cry2	Per2	0.5951065281741664
Cry2	Per3	0.6712805988777188
Cry2	Tef	0.7597038128475304
Dbp	Arntl	-0.9146446580320629
Dbp	Clock	-0.645511131925004
Dbp	Cry1	-0.3401804672897463
Dbp	Cry2	0.6618797053386846
Dbp	Npas2	-0.7654845391069139
Dbp	Nr1d1	0.6955807306126488
Dbp	Nr1d2	0.9111477553295785
Dbp	Per1	0.7732704055570547
Dbp	Per2	0.5543211162081426
Dbp	Per3	0.8117621483013249
Dbp	Tef	0.8443479194909007
Npas2	Arntl	0.7754709004193397
Npas2	Clock	0.6343961275585874
Npas2	Cry1	0.07402796765934631
Npas2	Cry2	-0.6263229987696222
Npas2	Dbp	-0.7654845391069139
Npas2	Nr1d1	-0.3498755031422754
Npas2	Nr1d2	-0.7461844309036201
Npas2	Per1	-0.6450779504073073
Npas2	Per2	-0.7086572507645479
Npas2	Per3	-0.7845410222647868
Npas2	Tef	-0.7983426906678266
Nr1d1	Arntl	-0.6037514051847261
Nr1d1	Clock	-0.3002463589006351
Nr1d1	Cry1	-0.7225359580320011
Nr1d1	Cry2	0.28367323665722516
Nr1d1	Dbp	0.6955807306126488
Nr1d1	Npas2	-0.3498755031422754
Nr1d1	Nr1d2	0.6772738906964219
Nr1d1	Per1	0.42422234261510466
Nr1d1	Per2	-0.06776682386516979
Nr1d1	Per3	0.336626676466772
Nr1d1	Tef	0.3810190556260799
Nr1d2	Arntl	-0.8614805872675428
Nr1d2	Clock	-0.6031794883488697
Nr1d2	Cry1	-0.40990436181618845
Nr1d2	Cry2	0.6234166103745656
Nr1d2	Dbp	0.9111477553295785
Nr1d2	Npas2	-0.7461844309036201
Nr1d2	Nr1d1	0.6772738906964219
Nr1d2	Per1	0.7132144125724547
Nr1d2	Per2	0.5292359564951081
Nr1d2	Per3	0.7673822369494325
Nr1d2	Tef	0.7487607429844136
Per1	Arntl	-0.7471112270277356
Per1	Clock	-0.6364952995268504
Per1	Cry1	-0.1411755648029434
Per1	Cry2	0.6454257049601584
Per1	Dbp	0.7732704055570547
Per1	Npas2	-0.6450779504073073
Per1	Nr1d1	0.42422234261510466
Per1	Nr1d2	0.7132144125724547
Per1	Per2	0.6079440950872126
Per1	Per3	0.7467578670868107
Per1	Tef	0.7756198279902018
Per2	Arntl	-0.5945528630679193
Per2	Clock	-0.5695840536120815
Per2	Cry1	0.25538495810553313
Per2	Cry2	0.5951065281741664
Per2	Dbp	0.5543211162081426
Per2	Npas2	-0.7086572507645479
Per2	Nr1d1	-0.06776682386516979
Per2	Nr1d2	0.5292359564951081
Per2	Per1	0.6079440950872126
Per2	Per3	0.7868301863101547
Per2	Tef	0.7530873999396855
Per3	Arntl	-0.823418212544465
Per3	Clock	-0.7144611850829129
Per3	Cry1	-0.02528160413657544
Per3	Cry2	0.6712805988777188
Per3	Dbp	0.8117621483013249
Per3	Npas2	-0.7845410222647868
Per3	Nr1d1	0.336626676466772
Per3	Nr1d2	0.7673822369494325
Per3	Per1	0.7467578670868107
Per3	Per2	0.7868301863101547
Per3	Tef	0.8738338205271359
Tef	Arntl	-0.8473980357473699
Tef	Clock	-0.7595101095772043
Tef	Cry1	-0.07811010288865948
Tef	Cry2	0.7597038128475304
Tef	Dbp	0.8443479194909007
Tef	Npas2	-0.7983426906678266
Tef	Nr1d1	0.3810190556260799
Tef	Nr1d2	0.7487607429844136
Tef	Per1	0.7756198279902018
Tef	Per2	0.7530873999396855
Tef	Per3	0.8738338205271359
