# Supplementary material for: Evidence for widespread dysregulation of circadian clock progression in human cancer
Source: PeerJ. 2018 Jan 31;6:e4327. doi: 10.7717/peerj.4327 (PMC5797448; doi:10.7717/peerj.4327)
Supplement: Table S3 [file peerj-06-4327-s004.csv]

Module	Term	Category	Count	P-value (nominal)	P-value (BH)
1	GO:0005887~integral component of plasma membrane	GOTERM_CC_DIRECT	15	7.081462752581087e-5	0.0031111043938125693
1	Transmembrane	UP_KEYWORDS	33	3.093962249013642e-5	0.004414661070676007
1	GO:0016021~integral component of membrane	GOTERM_CC_DIRECT	30	1.7820911062555313e-4	0.005214291232565449
1	Transmembrane helix	UP_KEYWORDS	32	8.487633355052035e-5	0.006050536737367662
1	GO:0005886~plasma membrane	GOTERM_CC_DIRECT	27	7.05589798665199e-5	0.006190170754311164
1	Membrane	UP_KEYWORDS	37	2.6771695331608556e-4	0.012681783067179597
1	GO:0016324~apical plasma membrane	GOTERM_CC_DIRECT	6	0.0019698760788389186	0.04245256089965521
1	LIM domain	UP_KEYWORDS	4	0.0012774587429719665	0.0446699013176034
1	GO:0070836~caveola assembly	GOTERM_BP_DIRECT	3	1.0087843762187067e-4	0.04823100679728609
2	Disulfide bond	UP_KEYWORDS	30	2.316919065078707e-6	2.872570306858835e-4
2	signal peptide	UP_SEQ_FEATURE	28	2.3799777656535067e-5	0.007161849232027673
2	GO:0043235~receptor complex	GOTERM_CC_DIRECT	6	1.0379310581443238e-4	0.011250272700287223
2	Membrane	UP_KEYWORDS	43	1.883149035202061e-4	0.011608716291698573
2	GO:0005886~plasma membrane	GOTERM_CC_DIRECT	29	3.5065054137488447e-4	0.018932295339046168
2	Lipoprotein	UP_KEYWORDS	11	8.201162897355481e-4	0.020141620694712037
2	Signal	UP_KEYWORDS	28	6.717667731733857e-4	0.020616285408926793
2	Glycoprotein	UP_KEYWORDS	30	5.150927093712083e-4	0.021070825519409864
2	Angiogenesis	UP_KEYWORDS	5	0.0010519366826418051	0.021516610110471346
2	disulfide bond	UP_SEQ_FEATURE	24	1.7854829304421422e-4	0.026602937575766483
2	Receptor	UP_KEYWORDS	15	0.0017512112070459922	0.030571590745283705
2	Transmembrane	UP_KEYWORDS	32	0.004024126964057064	0.048770427892638635
2	GO:0030666~endocytic vesicle membrane	GOTERM_CC_DIRECT	4	0.0018419988838843972	0.04899956166060038
3	Phosphoprotein	UP_KEYWORDS	473	1.4203966842886535e-26	5.326487566082451e-24
3	Alternative splicing	UP_KEYWORDS	547	5.189227449307214e-21	9.729801467451026e-19
3	Acetylation	UP_KEYWORDS	202	1.0881558169065725e-9	1.3601946424746103e-7
3	Ubl conjugation pathway	UP_KEYWORDS	61	5.061843158791002e-9	4.7454768548060855e-7
3	Zinc-finger	UP_KEYWORDS	120	6.727574300890158e-9	5.04567945092127e-7
3	Zinc	UP_KEYWORDS	147	1.1945640788943862e-8	7.466022763358282e-7
3	Nucleus	UP_KEYWORDS	278	1.4165593242668234e-8	7.58870784656196e-7
3	splice variant	UP_SEQ_FEATURE	398	6.962121771945611e-10	1.4787536178895166e-6
3	GO:0005515~protein binding	GOTERM_MF_DIRECT	446	9.793696589915021e-9	7.874101129345945e-6
3	GO:0005654~nucleoplasm	GOTERM_CC_DIRECT	166	4.382429695990903e-7	2.226026976713813e-4
3	Metal-binding	UP_KEYWORDS	194	4.8382955219518855e-6	2.2676993505699183e-4
3	Isopeptide bond	UP_KEYWORDS	75	1.3372066641275919e-5	5.570179765291838e-4
3	Transcription	UP_KEYWORDS	135	1.7041305046515698e-5	6.388502326581946e-4
3	Transcription regulation	UP_KEYWORDS	131	2.5821702470263598e-5	8.799093294623583e-4
3	RNA-binding	UP_KEYWORDS	49	4.4416594499074145e-5	0.001387086509529456
3	Protein transport	UP_KEYWORDS	45	9.159646642186258e-5	0.0026388389052237615
3	Ubl conjugation	UP_KEYWORDS	97	2.389416421674241e-4	0.0059564444569026875
3	Golgi apparatus	UP_KEYWORDS	54	2.3706923441221383e-4	0.006330697756868786
3	Coiled coil	UP_KEYWORDS	156	3.437999628359163e-4	0.008026808821571696
3	Cytoplasm	UP_KEYWORDS	232	3.936379085335211e-4	0.008647293834944447
3	Endoplasmic reticulum	UP_KEYWORDS	64	9.264502349533224e-4	0.019124749173086708
3	GO:0046872~metal ion binding	GOTERM_MF_DIRECT	123	7.348384407095529e-5	0.019501726153055232
3	GO:0004842~ubiquitin-protein transferase activity	GOTERM_MF_DIRECT	31	6.750293166847229e-5	0.026772191760567
3	GO:0005634~nucleus	GOTERM_CC_DIRECT	267	3.3386920147655466e-4	0.04152180747283052
3	GO:0005813~centrosome	GOTERM_CC_DIRECT	35	1.900777047690607e-4	0.04713717515862892
4	Phosphoprotein	UP_KEYWORDS	174	2.8591916442668013e-12	8.548880492398325e-10
4	GO:0016020~membrane	GOTERM_CC_DIRECT	62	1.334397344601583e-6	3.8690062277280113e-4
4	Alternative splicing	UP_KEYWORDS	186	4.972857533412071e-6	7.431677637136369e-4
4	splice variant	UP_SEQ_FEATURE	150	1.1097300421385886e-6	0.0012166338319886671
4	GO:0005178~integrin binding	GOTERM_MF_DIRECT	11	5.222564085363335e-6	0.002258821169316416
4	IPR013032:EGF-like, conserved site	INTERPRO	13	4.499824303524287e-5	0.027820220401850726
4	Polymorphism	UP_KEYWORDS	195	9.005364240937314e-4	0.037752033824156705
4	EGF-like domain	UP_KEYWORDS	12	5.403970208437674e-4	0.03960017401332461
4	Coiled coil	UP_KEYWORDS	63	0.0010900016482868282	0.03994147269682802
4	Cell adhesion	UP_KEYWORDS	18	4.332425178849064e-4	0.04226982386725564
4	Zymogen	UP_KEYWORDS	11	8.813819463643054e-4	0.04299012399243274
4	Cytoplasm	UP_KEYWORDS	92	7.422350325434655e-4	0.043430790219633586
5	79.B_cell_Activation	BBID	3	0.008018867161008488	0.047158920305779395
5	GO:0050853~B cell receptor signaling pathway	GOTERM_BP_DIRECT	4	1.752975580283877e-4	0.04956998372155452
